# Supplementary material for: Circulating Cell-Free DNA in Liquid Biopsies as Potential Biomarker for Bladder Cancer: A Systematic Review
Source: PubMed Central journal article supplement (PMC8005001; doi:10.3390/cancers13061448), 2021-03-22
Supplement: cancers-13-01448-s001.pdf [file cancers-13-01448-s001.pdf]

## Supplementary Material: Circulating Cell-Free DNA in Liquid Biopsies as Potential Biomarker for Bladder Cancer: A Systematic Review

Raquel Herranz, Julia Oto, Emma Plana, Álvaro Fernández-Pardo, Fernando Cana, Manuel Martínez-Sarmiento, César D. Vera-Donoso, Francisco España and Pilar Medina

**Table S1.** Description of the studies regarding cfDNA in liquid biopsies as potential biomarker for bladder cancer.

| Reference                 | N                                                                                                                                          | Liquid Biopsy | Sample Volume and cfDNA Isolation Kit Used                                                                                                                                                                         | Detection Method                                                                                                                                                                    | Genes Studied <sup>1</sup>                         | Clinically Relevant Findings                                                                                                                                                |
|---------------------------|--------------------------------------------------------------------------------------------------------------------------------------------|---------------|--------------------------------------------------------------------------------------------------------------------------------------------------------------------------------------------------------------------|-------------------------------------------------------------------------------------------------------------------------------------------------------------------------------------|----------------------------------------------------|-----------------------------------------------------------------------------------------------------------------------------------------------------------------------------|
| Zhao et al. 2020 [1]      | 47 BC patients<br>53 controls                                                                                                              | Urine         | Unspecified volume of urine supernatant<br>Magnetic Serum/Plasma DNA Maxi Kit (Tiangen Biotechnology, China)                                                                                                       | A cell-free single-molecule unique primer extension resequencing (cf-SUPER) technology                                                                                              | 22-gene targeted sequencing panel (uriprier panel) | Development of a novel cf-SUPER technology which detects cfDNA point mutations of cfDNA with diagnostic and staging purposes                                                |
| Hayashi et al. 2020 [2]   | Cohort 1:<br>74 BC patients<br>52 controls (benign hematuria)<br>Cohort 2:<br>40 BC patients, 36 patients under surveillance after surgery | Urine         | 12 mL urine supernatant<br>QIAamp Circulating Nucleic Acid Kit (Qiagen, Hilden, Germany)                                                                                                                           | ddPCR                                                                                                                                                                               | <i>TERT</i> promoter and <i>FGFR3</i>              | <i>TERT</i> promoter and <i>FGFR3</i> hotspot mutation analysis in urinary cfDNA by ddPCR combined with cytology has a higher sensitivity than when combined with UroVysion |
| Henriksen et al. 2020 [3] | 47 MIBC patients                                                                                                                           | Plasma        | 8 mL plasma<br>QIAamp Circulating Nucleic Acids Kit (Qiagen)<br>Using dual-sided selection with SPRI beads, cfDNA was separated in two fractions with short (< 1 kb) and long (> 1 kb) DNA fragments, respectively | The size-separated cfDNA was profiled on a LabChip GX (PerkinElmer, Waltham, MA, USA) and quantified using the high-sensitivity QuantiT dsDNA assay (Invitrogen, Carlsbad, CA, USA) | N/A                                                | After any kind of trauma, cfDNA concentration increases, but not ctDNA, which remains similar to pre-operative levels                                                       |

| Reference                 | N                                                                                                                              | Liquid Biopsy   | Sample Volume and cfDNA Isolation Kit Used                                                                                                                                                                                                                                                                                                                                                              | Detection Method                                                                                                                                                                      | Genes Studied <sup>1</sup>                                                                              | Clinically Relevant Findings                                                                                                                                                     |
|---------------------------|--------------------------------------------------------------------------------------------------------------------------------|-----------------|---------------------------------------------------------------------------------------------------------------------------------------------------------------------------------------------------------------------------------------------------------------------------------------------------------------------------------------------------------------------------------------------------------|---------------------------------------------------------------------------------------------------------------------------------------------------------------------------------------|---------------------------------------------------------------------------------------------------------|----------------------------------------------------------------------------------------------------------------------------------------------------------------------------------|
| Hentschel et al. 2020 [4] | 14 urothelial BC patients                                                                                                      | Urine           | 15 mL urine supernatant<br>QuickDNA™ Urine Kit (Zymo Research, Orange, CA, USA)                                                                                                                                                                                                                                                                                                                         | DNA methylation analysis after bisulfite conversion by multiplex qMSP                                                                                                                 | <i>FAM19A4</i> , <i>GHSR</i> , <i>MAL</i> , <i>PHACTR3</i> , <i>PRDM14</i> , <i>SST</i> and <i>ZIC1</i> | Correlation for most methylation markers studied between urine cfDNA and cellular DNA and tissue specimen, being greater in cellular DNA                                         |
| Pal et al. 2020 [5]       | 67 BC patients with oral Infigratinib                                                                                          | Plasma          | Unspecified volume of plasma<br>QIAamp Circulating Nucleic Acid Kit (Qiagen)                                                                                                                                                                                                                                                                                                                            | WGS libraries generated with the Illumina TruSeq Nano DNA Library Prep Kit (Illumina, San Diego, California)<br>600-gene pan-cancer panel on an Illumina HiSeq 2500 System (Illumina) | 600-gene pan-cancer panel                                                                               | Differences in the cumulative genomic profile observed between patients with upper-tract urothelial carcinoma and BC<br>Phase-2 clinical trial of Infigratinib (BGJ398)          |
| Ou et al. 2020 [6]        | 92 BC patients<br>33 controls                                                                                                  | Urine<br>Plasma | Unspecified volume of urine supernatant and plasma<br>GenMag Circulating Nucleic Acid Kit (GenMag Biotechnology, Beijing, China)                                                                                                                                                                                                                                                                        | NGS-based cfDNA allelic molecule-counting system termed the cfDNA barcode-enabled single-molecule test (cfBEST)                                                                       | 48-genes panel                                                                                          | Identification of a 5-genes panel for urine cfDNA ( <i>TERT</i> , <i>FGFR3</i> , <i>TP53</i> , <i>PIK3CA</i> , and <i>KRAS</i> ) to identify BC patients from hematuria patients |
| Ge et al. 2020 [7]        | Original cohort:<br>65 UC patients<br>95 controls<br>Validation cohort:<br>CNA data from 410 UCBs from The Cancer Genome Atlas | Urine           | Unspecified volume of urine supernatant<br>ZYMO Quick-DNA Urine Kit (D3061, Zymo Research)<br>cfDNA was size selected with 0.6 AMPure XP beads (Beckman Coulter) to remove large DNA fragments, and the remaining supernatant was purified by 0.3 beads to enrich the fragments with a range of approximately 100 to 300 base pairs (bp) to create libraries, which were sequenced on a HiSeq 10 system | CNAs screening profile by sWGS<br>UCdetector to identify CNAs                                                                                                                         | N/A                                                                                                     | Development of UCdetector based on a CNAs profile after screening using sWGS                                                                                                     |

| Reference                    | N                                         | Liquid Biopsy | Sample Volume and cfDNA Isolation Kit Used                                                           | Detection Method                                                                                                                                    | Genes Studied <sup>1</sup>                          | Clinically Relevant Findings                                                                                                                                                                                                                                                                 |
|------------------------------|-------------------------------------------|---------------|------------------------------------------------------------------------------------------------------|-----------------------------------------------------------------------------------------------------------------------------------------------------|-----------------------------------------------------|----------------------------------------------------------------------------------------------------------------------------------------------------------------------------------------------------------------------------------------------------------------------------------------------|
| Grivas et al. 2020 [8]       | 124 advanced UC patients                  | Blood         | Unspecified volume, sent to Guardant Health (Redwood City, CA, USA) for cfDNA analysis (Guardant360) | unknown                                                                                                                                             | 73-gene sequencing panel (Guardant360)              | Genomic alterations detected in most advanced urothelial carcinoma patients, results comparable with tissue<br>Alterations in <i>BRCA1</i> and <i>RAF1</i> have negative prognostic value                                                                                                    |
| Xu et al. 2019 [9]           | 103 NMIBC patients                        | Urine         | 1 mL urine supernatant QIAquick gel extraction kit (Qiagen)                                          | qPCR                                                                                                                                                | <i>IQGAP3/BMP4</i> and <i>IQGAP3/FAM107A</i> ratios | High <i>IQGAP3/BMP4</i> ratio in urine cfDNA was associated with worse recurrence-free and progression-free survival<br>Development of a 23-genes panel which contains the most frequent SMs in BCs patients                                                                                 |
| Ward et al. 2019 [10]        | 261 BC patients with SMs                  | Urine         | Unspecified volume of urine supernatant Quick-DNA Urine kits (Zymo Research)                         | Sequencing performed by a 23-genes panel                                                                                                            | A 23-genes panel                                    | Those SMs were reliably detected in both urine cfDNA and cellular DNA and comparable to those present in tumour tissue<br>Design of the ITO-MIL method, a selective method with the ability to rapidly preconcentrate target DNA from diluted plasma, to isolate ctDNA from clinical samples |
| Emaus et al. 2019 [11]       | Commercially available lyophilized plasma | Plasma        | Unspecified volume of plasma ITO-MIL                                                                 | DNA quantified by adding the DNA-enriched MIL to the qPCR buffer to streamline the extraction procedure                                             | <i>KRAS</i>                                         | ctDNA analysis can identify patients with metastatic relapse after cystectomy with a 100% sensitivity and 98% specificity, and its dynamics during chemotherapy were associated with disease recurrence                                                                                      |
| Christensen et al. 2019 [12] | 68 patients with locally advanced BC      | Plasma        | A median of 7.5 mL of plasma (range: 1-10 mL) QIAamp Circulating Nucleic Acid kit (Qiagen)           | Plasma multiplex-PCR NGS Sequencing performed in an Illumina HiSeq 2500 (Illumina) Missense mutations analyzed using PolyPhen2 and MutationAssessor | 34 DNA damage response (DDR)-associated genes       | Pathologic downstaging was associated with some mutations                                                                                                                                                                                                                                    |

| Reference                            | N                                                                       | Liquid Biopsy | Sample Volume and cfDNA Isolation Kit Used                                                                                                                                                                                                                                                                               | Detection Method                                   | Genes Studied <sup>1</sup>            | Clinically Relevant Findings                                                                                                                                                                                                                                                                                                                                                                                                                                                                                                                                                                              |
|--------------------------------------|-------------------------------------------------------------------------|---------------|--------------------------------------------------------------------------------------------------------------------------------------------------------------------------------------------------------------------------------------------------------------------------------------------------------------------------|----------------------------------------------------|---------------------------------------|-----------------------------------------------------------------------------------------------------------------------------------------------------------------------------------------------------------------------------------------------------------------------------------------------------------------------------------------------------------------------------------------------------------------------------------------------------------------------------------------------------------------------------------------------------------------------------------------------------------|
| Cheng et al. 2019 [13]               | 46 BC patients<br>39 controls                                           | Urine         | 10 mL urine supernatant<br>Samples were supplemented with 15 mL 6 mol/L guanidine thiocyanate (Sigma–Aldrich) and 1 mL resin (Wizard Plus Minipreps DNA Purification System; Promega, Madison, WI, USA)<br>The resin-DNA complex was isolated, washed and eluted using the Wizard Plus Minipreps DNA Purification System | qPCR<br>sWGS-bisulfite sequencing of urinary cfDNA | N/A                                   | A combination of methylome and CNAs were able to detect BC with a sensitivity of 93.5% (84.2% for low-grade non-muscle invasive BC) and a specificity of 95.8%, and reflected stage and tumour size<br>MIBC was associated with a higher proportion of long cfDNA, as well as longer ctDNA fragments                                                                                                                                                                                                                                                                                                      |
| Hayashi et al. 2019 [14]             | 153 BC patients, including 56 upper-tract urothelial carcinoma patients | Urine         | A median of 12 mL urine supernatant (range 4–32 mL)<br>QIAamp Circulating Nucleic Acid Kit (Qiagen)                                                                                                                                                                                                                      | ddPCR                                              | <i>TERT</i> promoter and <i>FGFR3</i> | Analysis of <i>TERT</i> promoter and <i>FGFR3</i> hotspot mutations in cfDNA is sensible enough to be used in clinical practice and, in combination with cytology, could be used to diagnose and stage upper-tract urothelial carcinoma<br>Unlike spectrophotometry, z-identified differences in cfDNA concentrations from blood and urine of BC patients and controls, as well as a differences over time<br>cfDNA seems to provide no advantage in diagnostic potential compared to DNA found in urine sediment when analysing two abundant point-mutations (228C>T/250C>T) in the <i>TERT</i> promoter |
| do Nascimento Alves et al. 2019 [15] | 30 BC patients                                                          | Plasma        | 1 mL plasma<br>GFXTM kit (Amersham Pharmacia Biotech, Inc, Piscataway, NJ, USA)                                                                                                                                                                                                                                          | Z-scan and spectrophotometry                       | N/A                                   | cfDNA seems to provide no advantage in diagnostic potential compared to DNA found in urine sediment when analysing two abundant point-mutations (228C>T/250C>T) in the <i>TERT</i> promoter                                                                                                                                                                                                                                                                                                                                                                                                               |
| Stasik et al. 2019 [16]              | 53 BC patients<br>36 controls                                           | Urine         | Unspecified volume of urine supernatant<br>QIAamp viral RNA Mini kit (Qiagen)                                                                                                                                                                                                                                            | qPCR and sequencing                                | <i>TERT</i> promoter                  | cfDNA seems to provide no advantage in diagnostic potential compared to DNA found in urine sediment when analysing two abundant point-mutations (228C>T/250C>T) in the <i>TERT</i> promoter                                                                                                                                                                                                                                                                                                                                                                                                               |

| Reference             | N                                                                                                           | Liquid Biopsy | Sample Volume and cfDNA Isolation Kit Used                                                                                                   | Detection Method                                                                                                                                                                             | Genes Studied <sup>1</sup>                                                                                                          | Clinically Relevant Findings                                                                                                                                                                                                                                                                                                                                                                                                                                                                                                                                                  |
|-----------------------|-------------------------------------------------------------------------------------------------------------|---------------|----------------------------------------------------------------------------------------------------------------------------------------------|----------------------------------------------------------------------------------------------------------------------------------------------------------------------------------------------|-------------------------------------------------------------------------------------------------------------------------------------|-------------------------------------------------------------------------------------------------------------------------------------------------------------------------------------------------------------------------------------------------------------------------------------------------------------------------------------------------------------------------------------------------------------------------------------------------------------------------------------------------------------------------------------------------------------------------------|
| Xu et al. 2019 [17]   | Screening cohort:<br>40 BC patients<br>41 controls<br>Validation cohort:<br>149 BC patients<br>125 controls | Urine         | 1 mL urine supernatant<br>QIAquick gel extraction kit (Qiagen)                                                                               | qPCR                                                                                                                                                                                         | Seven candidate genes-ratios                                                                                                        | The ratios IQGAP3/BMP4 and IQGAP3/FAM107A in cfDNA were significantly increased in BC patients compared with those with hematuria, so they could be used as non-invasive urine-based diagnostic markers                                                                                                                                                                                                                                                                                                                                                                       |
| Lee et al. 2018 [18]  | 9 BC patients                                                                                               | Urine         | 2–4 mL urine supernatant<br>MagMax Cell-Free DNA Isolation Kit (Thermo Fisher Scientific, Waltham, MA, USA)                                  | Target gene captured with customized probes and a Celeomics target capture kit<br>NGS performed with the Illumina NextSeq. 500 platform (Illumina)<br>sWGS was used for the detection of CNV | <i>ARID1A</i> , <i>PIK3CA</i> , <i>FGFR3</i> , <i>HRAS</i> , <i>KMT2D</i> , <i>RB1</i> , <i>TP53</i> , <i>KDM6A</i> and <i>STAG</i> | The genetic alterations found in cfDNA and derived from exosomes are comparable to those found in tumour samples                                                                                                                                                                                                                                                                                                                                                                                                                                                              |
| Li et al. 2019 [19]   | 24 BC patients                                                                                              | Urine         | 1.8 mL urine supernatant<br>MagMAX™ Cell-Free DNA Isolation kit (Applied Biosystems Inc., Foster City, CA, USA)                              | qPCR<br>cfDNA fragments distribution was analyzed by Agilent 2200, and the frequency of specific mutations of urinary system disease was detected by NGS method                              | <i>ACTB</i> ( <i>ACTB-41</i> and <i>ACB-127</i> )                                                                                   | Development of standardised urine collection tubes to prevent cfDNA degradation and maintain urine cells in their original form during the sample collection process, ensuring stabilization of the original proportion and integrity of urine cfDNA, and minimising the background noise caused by urinary cellular DNA releasing<br>ctDNA VAF reduction in time (after Durvalumab treatment) seems to be related to reduction of tumour volume, longer progression-free and overall survival, and may be a predictor of long-term benefit from immunotherapy in BC patients |
| Raja et al. 2018 [20] | 29 UC patients                                                                                              | Plasma        | 1 mL plasma<br>QIAamp Circulating Nucleic Acid Kit (Qiagen)<br>Concentrated using Agencourt Ampure XP beads (Beckman Coulter, Brea, CA, USA) | NGS-based 73-genes panel (Guardant360)                                                                                                                                                       | NGS-based 73-genes panel (Guardant360)                                                                                              |                                                                                                                                                                                                                                                                                                                                                                                                                                                                                                                                                                               |

| Reference                             | N                                                        | Liquid Biopsy   | Sample Volume and cfDNA Isolation Kit Used                                                               | Detection Method                                                                    | Genes Studied <sup>1</sup>            | Clinically Relevant Findings                                                                                                                                                                                                                                                                |
|---------------------------------------|----------------------------------------------------------|-----------------|----------------------------------------------------------------------------------------------------------|-------------------------------------------------------------------------------------|---------------------------------------|---------------------------------------------------------------------------------------------------------------------------------------------------------------------------------------------------------------------------------------------------------------------------------------------|
| Kim et al. 2018 [21]                  | 92 BC patients<br>120 healthy controls<br>with hematuria | Urine           | 1 mL urine supernatant<br>QIAamp Circulating Nucleic Acid Kit (Qiagen)                                   | RT-qPCR                                                                             | <i>CDC20, IQGAP3, TOP2A, UBE2C</i>    | Levels of <i>IQGAP3</i> in urine cfDNA of BC patients were significantly higher than those in healthy controls or patients with hematuria<br>The genomic profile of metastatic urothelial carcinoma was similar in cfDNA and tissue specimens                                               |
| Agarwal et al. 2018 [22]              | 369 metastatic UC patients (294 mLTUC and 75 mUTUC)      | Blood           | 1.5-5 mL plasma<br>Concentrated and size-selected using Agencourt Ampure XP beads (Beckman Coulter) [23] | Guardant360 platform                                                                | NGS-based 73-gene panel (Guardant360) | The frequency of genomic alterations is similar between mLTUC and mUTUC patients<br>The TERT 228 G>A/T mutation was counted along with the WT gene and in patients containing that mutation in their tumours as well as in cell pellet, and the detection in urine had a 92% of sensitivity |
| Russo et al. 2018 [24]                | 104 BC patients                                          | Urine           | 10 mL urine supernatant<br>Quick-DNA Urine kit (D3061, Zymo Research)                                    | ddPCR                                                                               | <i>TERT</i> 228 G>A/T mutation        | Development of an optimized targeted NGS approach (51-genes panel) of cfDNA from plasma                                                                                                                                                                                                     |
| Christensen et al. 2018 [25]          | 65 BC patients                                           | Plasma          | Unspecified volume of plasma<br>QIASymphony Circulating NA kit (Qiagen)                                  | 51-genes panel targeted NGS (Validation of targeted NGS by ddPCR)                   | 51-genes panel                        | cfDNA analysis allows early detection of metastatic relapse and indications of treatment response                                                                                                                                                                                           |
| Birkenkamp-Demtröder et al. 2018 [26] | 26 MIBC patients                                         | Plasma<br>Urine | Unspecified volume of plasma and urine                                                                   | ddPCR after WES for identifying an adequate number of mutations for ctDNA screening | <i>PIK3CA</i> and <i>FGFR3</i>        |                                                                                                                                                                                                                                                                                             |

| Reference                             | N                                                                                                                     | Liquid Biopsy   | Sample Volume and cfDNA Isolation Kit Used                                                                                                                                                                                                     | Detection Method                                                                                              | Genes Studied <sup>1</sup>                                                                                                      | Clinically Relevant Findings                                                                                                                                                                                                                                                                                  |
|---------------------------------------|-----------------------------------------------------------------------------------------------------------------------|-----------------|------------------------------------------------------------------------------------------------------------------------------------------------------------------------------------------------------------------------------------------------|---------------------------------------------------------------------------------------------------------------|---------------------------------------------------------------------------------------------------------------------------------|---------------------------------------------------------------------------------------------------------------------------------------------------------------------------------------------------------------------------------------------------------------------------------------------------------------|
| Soave et al. 2017 [27]                | 85 BC patients                                                                                                        | Serum<br>Plasma | 2 mL serum<br>2 mL plasma<br>QiAmp DNA Blood Mini kit (Qiagen)<br>QiAmp Circulating Nucleic Acid kit (Qiagen)<br>NucleoSpin Plasma XS kit (Macherey Nagel, Düren, Germany)<br>PME free-circulating DNA Extraction kit (Analytik Jena, Germany) | CNV identified by MLPA                                                                                        | 49 genes                                                                                                                        | MLPA only detected CNVs in cfDNA extracted from serum using the PME free-circulating DNA Extraction kit                                                                                                                                                                                                       |
| Vandekerckhove et al. 2017 [28]       | 51 BC patients (including 37 with metastatic disease)                                                                 | Plasma          | Up to 6 mL plasma<br>Circulating Nucleic Acids kit (Qiagen)                                                                                                                                                                                    | Sequencing with a combination of WES and targeted sequencing                                                  | 50 BC driver genes                                                                                                              | The distribution of all alterations found was consistent with previous studies in localized MIBC. Also, a novel <i>FGFR3</i> gene fusion was identified in consecutive samples from one patient<br>Urine cfDNA integrity analysis is a new, non-invasive method for early diagnosis of BC and prostate cancer |
| Casadio et al. 2017 [29] <sup>2</sup> | 52 BC patients <sup>2</sup><br>46 symptomatic patients <sup>2</sup><br>32 controls <sup>2</sup><br>363 NMIBC patients | Urine           | 1 mL urine supernatant<br>Qiamp DNA minikit (Qiagen)                                                                                                                                                                                           | qPCR                                                                                                          | <i>c-Myc</i> , <i>BCAS1</i> , <i>HER2</i> and <i>AR</i>                                                                         | Increased levels of <i>FGFR3</i> and <i>PIK3CA</i> mutated DNA in urine and plasma are indicative of later progression and metastasis in BC                                                                                                                                                                   |
| Christensen et al. 2017 [30]          | 468 BC patients undergoing radical cystectomy                                                                         | Urine<br>Plasma | 2.5-4.5 mL urine<br>2.5-4.5 mL plasma<br>QIASymphony Circulating NA kit (Qiagen)                                                                                                                                                               | ddPCR                                                                                                         | <i>FGFR3</i> and <i>PIK3CA</i> hotspot mutations                                                                                | SMs are reliably detected in urine cfDNA                                                                                                                                                                                                                                                                      |
| Togneri et al. 2016 [31]              | 23 BC patients<br>12 controls                                                                                         | Urine           | Unspecified volume of urine supernatant<br>Urine DNA Isolation Kit (Slurry Format; Norgen Biotek Corporation, Thorold, ON, Canada)                                                                                                             | OncoScan assay for the identification of CNAs, loss of heterozygosity and recurrent clinically actionable SMs | <i>BRAF</i> , <i>KRAS</i> , <i>EGFR</i> , <i>IDH1</i> , <i>IDH2</i> , <i>PTEN</i> , <i>PIK3CA</i> , <i>NRAS</i> and <i>TP53</i> | cfDNA seems to have higher analytical sensitivity for detection of clinically actionable genomic aberrations than cellular DNA                                                                                                                                                                                |

| Reference                             | N                                                                    | Liquid Biopsy   | Sample Volume and cfDNA Isolation Kit Used                                                            | Detection Method                                                                                                                                                                         | Genes Studied <sup>1</sup>                                 | Clinically Relevant Findings                                                                                                                                                                                                                                                                               |
|---------------------------------------|----------------------------------------------------------------------|-----------------|-------------------------------------------------------------------------------------------------------|------------------------------------------------------------------------------------------------------------------------------------------------------------------------------------------|------------------------------------------------------------|------------------------------------------------------------------------------------------------------------------------------------------------------------------------------------------------------------------------------------------------------------------------------------------------------------|
| Kim et al. 2016 [32]                  | 83 BC patients<br>54 non-malignant hematuric patients<br>61 controls | Urine           | 1 mL urine supernatant<br>QIAquick gel extraction kit (Qiagen)                                        | qPCR                                                                                                                                                                                     | <i>TopoIIA</i>                                             | The expression of urine <i>TopoIIA</i> cfDNA in BC patients was significantly higher than in controls and hematuria patients. It was also higher in MIBC than in NMIBC<br>Development of one to six personalized assays per patient for surveillance using genomic variants in ctDNA from plasma and urine |
| Birkenkamp-Demtröder et al. 2016 [33] | 12 NMIBC patients (6 progressive and 6 recurrent)                    | Plasma<br>Urine | An average of 2.2 mL plasma<br>An average of 3.4 mL urine<br>QIAasymphony Circulating NA kit (Qiagen) | They used 3 different methods to identify genomic variants in liquid biopsies and matching tumour tissue: WGS, WES and mate-pair sequencing, and monitored the somatic variants by ddPCR | <i>ARID1A</i> , <i>RBM10</i> , <i>VCAN</i> and <i>KLF3</i> | ctDNA can be detected in plasma and urine, even in NIBC patients, with high levels of tDNA detectable before progression, especially in urine samples<br>Development of a method to discriminate between BC patients and controls by quantification of urine cfDNA                                         |
| Brisuda et al. 2016 [34]              | 66 BC patients<br>34 controls                                        | Urine           | 2 mL urine<br>QIAamp Circulating Nucleic Acid Kit (Qiagen)                                            | qPCR                                                                                                                                                                                     | <i>GAPDH</i>                                               | Development of a method to discriminate between BC patients and controls by quantification of urine cfDNA                                                                                                                                                                                                  |

<sup>1</sup> When a panel of genes has been employed, these have not been detailed not to overexpand. <sup>2</sup> The methodology of this study was detailed in a previously article from the same group, which is not included in the table on its own because it was published earlier than 2015 [35]. Abbreviations: aUC, advanced urothelial carcinoma; BC, bladder cancer; CNAs, copy number alterations; cfDNA, cell-free DNA; ctDNA, circulating tumor DNA; ddPCR, Droplet Digital polymerase chain reaction; MIBC, muscle invasive bladder cancer; mL TUC, lower tract metastatic urothelial carcinoma; mUC, metastatic urothelial carcinoma; mUTUC, metastatic upper tract urothelial carcinoma; PCR, polymerase chain reaction; qPCR, real time polymerase chain reaction; UC, urothelial carcinoma; WES, whole exome sequencing; WGS, whole genome sequencing; sWGS, shallow whole genome sequencing.

## References

- Zhao, C.; Pan, Y.; Wang, Y.; Li, Y.; Han, W.; Lu, L.; Tang, W.; Li, P.; Ou, Z.; Zhang, M., et al. A novel cell-free single-molecule unique primer extension resequencing (cf-SUPER) technology for bladder cancer non-invasive detection in urine. *Transl. Androl. Urol.* **2020**, *9*, 1222–1231, doi:10.21037/tau-19-774.
- Hayashi, Y.; Fujita, K.; Matsuzaki, K.; Eich, M.L.; Tomiyama, E.; Matsushita, M.; Koh, Y.; Nakano, K.; Wang, C.; Ishizuya, Y., et al. Clinical Significance of Hotspot Mutation Analysis of Urinary Cell-Free DNA in Urothelial Bladder Cancer. *Front. Oncol.* **2020**, *10*, 755, doi:10.3389/fonc.2020.00755.



3. Henriksen, T.V.; Reinert, T.; Christensen, E.; Sethi, H.; Birkenkamp-Demtröder, K.; Gögenur, M.; Gögenur, I.; Zimmermann, B.G.; Dyrskjøt, L.; Andersen, C.L. The effect of surgical trauma on circulating free DNA levels in cancer patients-implications for studies of circulating tumor DNA. *Mol. Oncol.* **2020**, *14*, 1670–1679, doi:10.1002/1878-0261.12729.
4. Hentschel, A.E.; Nieuwenhuijzen, J.A.; Bosschieter, J.; Splunter, A.P.V.; Lissenberg-Witte, B.I.; Voorn, J.P.V.; Segerink, L.I.; Moorselaar, R.; Steenberg, R.D.M. Comparative Analysis of Urine Fractions for Optimal Bladder Cancer Detection Using DNA Methylation Markers. *Cancers (Basel)* **2020**, *12*, doi:10.3390/cancers12040859.
5. Pal, S.K.; Bajorin, D.; Dizman, N.; Hoffman-Censits, J.; Quinn, D.I.; Petrylak, D.P.; Galsky, M.D.; Vaishampayan, U.; De Giorgi, U.; Gupta, S., et al. Infigratinib in upper tract urothelial carcinoma versus urothelial carcinoma of the bladder and its association with comprehensive genomic profiling and/or cell-free DNA results. *Cancer* **2020**, *126*, 2597–2606, doi:10.1002/cncr.32806.
6. Ou, Z.; Li, K.; Yang, T.; Dai, Y.; Chandra, M.; Ning, J.; Wang, Y.; Xu, R.; Gao, T.; Xie, Y., et al. Detection of bladder cancer using urinary cell-free DNA and cellular DNA. *Clin. Transl. Med.* **2020**, *9*, 4, doi:10.1186/s40169-020-0257-2.
7. Ge, G.; Peng, D.; Guan, B.; Zhou, Y.; Gong, Y.; Shi, Y.; Hao, X.; Xu, Z.; Qi, J.; Lu, H., et al. Urothelial Carcinoma Detection Based on Copy Number Profiles of Urinary Cell-Free DNA by Shallow Whole-Genome Sequencing. *Clin. Chem.* **2020**, *66*, 188–198, doi:10.1373/clinchem.2019.309633.
8. Grivas, P.; Lalani, A.A.; Pond, G.R.; Nagy, R.J.; Faltas, B.; Agarwal, N.; Gupta, S.V.; Drakaki, A.; Vaishampayan, U.N.; Wang, J., et al. Circulating Tumor DNA Alterations in Advanced Urothelial Carcinoma and Association with Clinical Outcomes: A Pilot Study. *Eur. Urol. Oncol.* **2020**, *3*, 695–699, doi:10.1016/j.euo.2019.02.004.
9. Xu, Y.; Kim, Y.H.; Jeong, P.; Piao, X.M.; Byun, Y.J.; Seo, S.P.; Kang, H.W.; Kim, W.T.; Lee, J.Y.; Ryu, D.H., et al. Urinary Cell-Free DNA IQGAP3/BMP4 Ratio as a Prognostic Marker for Non-Muscle-Invasive Bladder Cancer. *Clin. Genitourin. Cancer* **2019**, *17*, e704–e711, doi:10.1016/j.clgc.2019.04.001.
10. Ward, D.G.; Gordon, N.S.; Boucher, R.H.; Pirrie, S.J.; Baxter, L.; Ott, S.; Silcock, L.; Whalley, C.M.; Stockton, J.D.; Beggs, A.D., et al. Targeted deep sequencing of urothelial bladder cancers and associated urinary DNA: a 23-gene panel with utility for non-invasive diagnosis and risk stratification. *BJU Int.* **2019**, *124*, 532–544, doi:10.1111/bju.14808.
11. Emaus, M.N.; Varona, M.; Anderson, J.L. Sequence-specific preconcentration of a mutation prone KRAS fragment from plasma using ion-tagged oligonucleotides coupled to qPCR compatible magnetic ionic liquid solvents. *Anal. Chim. Acta.* **2019**, *1068*, 1–10, doi:10.1016/j.aca.2019.04.005.
12. Christensen, E.; Birkenkamp-Demtröder, K.; Sethi, H.; Shchegrova, S.; Salari, R.; Nordentoft, I.; Wu, H.T.; Knudsen, M.; Lamy, P.; Lindsborg, S.V., et al. Early Detection of Metastatic Relapse and Monitoring of Therapeutic Efficacy by Ultra-Deep Sequencing of Plasma Cell-Free DNA in Patients With Urothelial Bladder Carcinoma. *J. Clin. Oncol.* **2019**, *37*, 1547–1557, doi:10.1200/jco.18.02052.
13. Cheng, T.H.T.; Jiang, P.; Teoh, J.Y.C.; Heung, M.M.S.; Tam, J.C.W.; Sun, X.; Lee, W.S.; Ni, M.; Chan, R.C.K.; Ng, C.F., et al. Noninvasive Detection of Bladder Cancer by Shallow-Depth Genome-Wide Bisulfite Sequencing of Urinary Cell-Free DNA for Methylation and Copy Number Profiling. *Clin. Chem.* **2019**, *65*, 927–936, doi:10.1373/clinchem.2018.301341.
14. Hayashi, Y.; Fujita, K.; Matsuzaki, K.; Matsushita, M.; Kawamura, N.; Koh, Y.; Nakano, K.; Wang, C.; Ishizuya, Y.; Yamamoto, Y., et al. Diagnostic potential of TERT promoter and FGFR3 mutations in urinary cell-free DNA in upper tract urothelial carcinoma. *Cancer Sci.* **2019**, *110*, 1771–1779, doi:10.1111/cas.14000.
15. do Nascimento Alves, S.; Lavalhegas Hallack, M.; Moreira Perez, M.; da Costa Aguiar Alves, B.; da Silva, L.H.; Afonso Fonseca, F.L. Application of the Z-scan technique for the detection of CFCDNA (cell-free circulating DNA) and urine DNA (uDNA) in patients with bladder cancer. *Photodiagnosis Photodyn. Ther.* **2019**, *26*, 131–133, doi:10.1016/j.pdpdt.2019.02.022.
16. Stasik, S.; Salomo, K.; Heberling, U.; Froehner, M.; Sommer, U.; Baretton, G.B.; Ehninger, G.; Wirth, M.P.; Thiede, C.; Fuessel, S. Evaluation of TERT promoter mutations in urinary cell-free DNA and sediment DNA for detection of bladder cancer. *Clin. Biochem.* **2019**, *64*, 60–63, doi:10.1016/j.clinbiochem.2018.11.009.

17. Xu, Y.; Kim, Y.H.; Jeong, P.; Piao, X.M.; Byun, Y.J.; Kang, H.W.; Kim, W.T.; Lee, J.Y.; Kim, I.Y.; Moon, S.K., et al. Diagnostic value of combined IQGAP3/BMP4 and IQGAP3/FAM107A expression ratios in urinary cell-free DNA for discriminating bladder cancer from hematuria. *Urol. Oncol.* **2019**, *37*, 86–96, doi:10.1016/j.urolonc.2018.10.023.
18. Lee, D.H.; Yoon, H.; Park, S.; Kim, J.S.; Ahn, Y.H.; Kwon, K.; Lee, D.; Kim, K.H. Urinary Exosomal and cell-free DNA Detects Somatic Mutation and Copy Number Alteration in Urothelial Carcinoma of Bladder. *Sci. Rep.* **2018**, *8*, 14707, doi:10.1038/s41598-018-32900-6.
19. Li, P.; Ning, J.; Luo, X.; Du, H.; Zhang, Q.; Zhou, G.; Du, Q.; Ou, Z.; Wang, L.; Wang, Y. New method to preserve the original proportion and integrity of urinary cell-free DNA. *J. Clin. Lab. Anal.* **2019**, *33*, e22668, doi:10.1002/jcla.22668.
20. Raja, R.; Kuziora, M.; Brohawn, P.Z.; Higgs, B.W.; Gupta, A.; Dennis, P.A.; Ranade, K. Early Reduction in ctDNA Predicts Survival in Patients with Lung and Bladder Cancer Treated with Durvalumab. *Clin. Cancer Res.* **2018**, *24*, 6212–6222, doi:10.1158/1078-0432.Ccr-18-0386.
21. Kim, W.T.; Kim, Y.H.; Jeong, P.; Seo, S.P.; Kang, H.W.; Kim, Y.J.; Yun, S.J.; Lee, S.C.; Moon, S.K.; Choi, Y.H., et al. Urinary cell-free nucleic acid IQGAP3: a new non-invasive diagnostic marker for bladder cancer. *Oncotarget* **2018**, *9*, 14354–14365, doi:10.18632/oncotarget.24436.
22. Agarwal, N.; Pal, S.K.; Hahn, A.W.; Nussenzweig, R.H.; Pond, G.R.; Gupta, S.V.; Wang, J.; Bilen, M.A.; Naik, G.; Ghatalia, P., et al. Characterization of metastatic urothelial carcinoma via comprehensive genomic profiling of circulating tumor DNA. *Cancer* **2018**, *124*, 2115–2124, doi:10.1002/cncr.31314.
23. Lanman, R.B.; Mortimer, S.A.; Zill, O.A.; Sebisano, D.; Lopez, R.; Blau, S.; Collisson, E.A.; Divers, S.G.; Hoon, D.S.; Kopetz, E.S., et al. Analytical and Clinical Validation of a Digital Sequencing Panel for Quantitative, Highly Accurate Evaluation of Cell-Free Circulating Tumor DNA. *PLoS One* **2015**, *10*, e0140712, doi:10.1371/journal.pone.0140712.
24. Russo, I.J.; Ju, Y.; Gordon, N.S.; Zeegers, M.P.; Cheng, K.K.; James, N.D.; Bryan, R.T.; Ward, D.G. Toward Personalised Liquid Biopsies for Urothelial Carcinoma: Characterisation of ddPCR and Urinary cfDNA for the Detection of the TERT 228G>A/T Mutation. *Bladder Cancer* **2018**, *4*, 41–48, doi:10.3233/blc-170152.
25. Christensen, E.; Nordentoft, I.; Vang, S.; Birkenkamp-Demtröder, K.; Jensen, J.B.; Agerbæk, M.; Pedersen, J.S.; Dyrskjöt, L. Optimized targeted sequencing of cell-free plasma DNA from bladder cancer patients. *Sci. Rep.* **2018**, *8*, 1917, doi:10.1038/s41598-018-20282-8.
26. Birkenkamp-Demtröder, K.; Christensen, E.; Nordentoft, I.; Knudsen, M.; Taber, A.; Høyer, S.; Lamy, P.; Agerbæk, M.; Jensen, J.B.; Dyrskjöt, L. Monitoring Treatment Response and Metastatic Relapse in Advanced Bladder Cancer by Liquid Biopsy Analysis. *Eur. Urol.* **2018**, *73*, 535–540, doi:10.1016/j.eururo.2017.09.011.
27. Soave, A.; Chun, F.K.; Hillebrand, T.; Rink, M.; Weisbach, L.; Steinbach, B.; Fisch, M.; Pantel, K.; Schwarzenbach, H. Copy number variations of circulating, cell-free DNA in urothelial carcinoma of the bladder patients treated with radical cystectomy: a prospective study. *Oncotarget* **2017**, *8*, 56398–56407, doi:10.18632/oncotarget.17657.
28. Vandekerckhove, G.; Todenhöfer, T.; Annala, M.; Struss, W.J.; Wong, A.; Beja, K.; Ritch, E.; Brahmabhatt, S.; Volik, S.V.; Hennenlotter, J., et al. Circulating Tumor DNA Reveals Clinically Actionable Somatic Genome of Metastatic Bladder Cancer. *Clin. Cancer Res.* **2017**, *23*, 6487–6497, doi:10.1158/1078-0432.Ccr-17-1140.
29. Casadio, V.; Salvi, S.; Martignano, F.; Gunelli, R.; Ravaioli, S.; Calistri, D. Cell-Free DNA Integrity Analysis in Urine Samples. *J Vis Exp* **2017**, 10.3791/55049, doi:10.3791/55049.
30. Christensen, E.; Birkenkamp-Demtröder, K.; Nordentoft, I.; Høyer, S.; van der Keur, K.; van Kessel, K.; Zwarthoff, E.; Agerbæk, M.; Ørntoft, T.F.; Jensen, J.B., et al. Liquid Biopsy Analysis of FGFR3 and PIK3CA Hotspot Mutations for Disease Surveillance in Bladder Cancer. *Eur. Urol.* **2017**, *71*, 961–969, doi:10.1016/j.eururo.2016.12.016.
31. Togneri, F.S.; Ward, D.G.; Foster, J.M.; Devall, A.J.; Wojtowicz, P.; Alyas, S.; Vasques, F.R.; Oumie, A.; James, N.D.; Cheng, K.K., et al. Genomic complexity of urothelial bladder cancer revealed in urinary cfDNA. *Eur. J. Hum. Genet.* **2016**, *24*, 1167–1174, doi:10.1038/ejhg.2015.281.

32. Kim, Y.H.; Yan, C.; Lee, I.S.; Piao, X.M.; Byun, Y.J.; Jeong, P.; Kim, W.T.; Yun, S.J.; Kim, W.J. Value of urinary topoisomerase-IIA cell-free DNA for diagnosis of bladder cancer. *Investig. Clin. Urol.* **2016**, *57*, 106–112, doi:10.4111/icu.2016.57.2.106.
33. Birkenkamp-Demtröder, K.; Nordentoft, I.; Christensen, E.; Høyer, S.; Reinert, T.; Vang, S.; Borre, M.; Agerbæk, M.; Jensen, J.B.; Ørntoft, T.F., et al. Genomic Alterations in Liquid Biopsies from Patients with Bladder Cancer. *Eur. Urol.* **2016**, *70*, 75–82, doi:10.1016/j.eururo.2016.01.007.
34. Brisuda, A.; Pazourkova, E.; Soukup, V.; Horinek, A.; Hrbáček, J.; Capoun, O.; Svobodova, I.; Pospisilova, S.; Korabecna, M.; Mares, J., et al. Urinary Cell-Free DNA Quantification as Non-Invasive Biomarker in Patients with Bladder Cancer. *Urol. Int.* **2016**, *96*, 25–31, doi:10.1159/000438828.
35. Casadio, V.; Calistri, D.; Tebaldi, M.; Bravaccini, S.; Gunelli, R.; Martorana, G.; Bertaccini, A.; Serra, L.; Scarpi, E.; Amadori, D., et al. Urine cell-free DNA integrity as a marker for early bladder cancer diagnosis: preliminary data. *Urol. Oncol.* **2013**, *31*, 1744–1750, doi:10.1016/j.urolonc.2012.07.013.
